# Supplementary material for: Rambaldo verso l'India fra mostri e avventure. V
Source: publisher site journal article supplement (doi:10.18632/aging.203426), 1997-01-01
Supplement: Supplementary file [file aging-v13i16-203426-supplementary-material-SD1.pdf]

SUPPLEMENTARY FIGURES

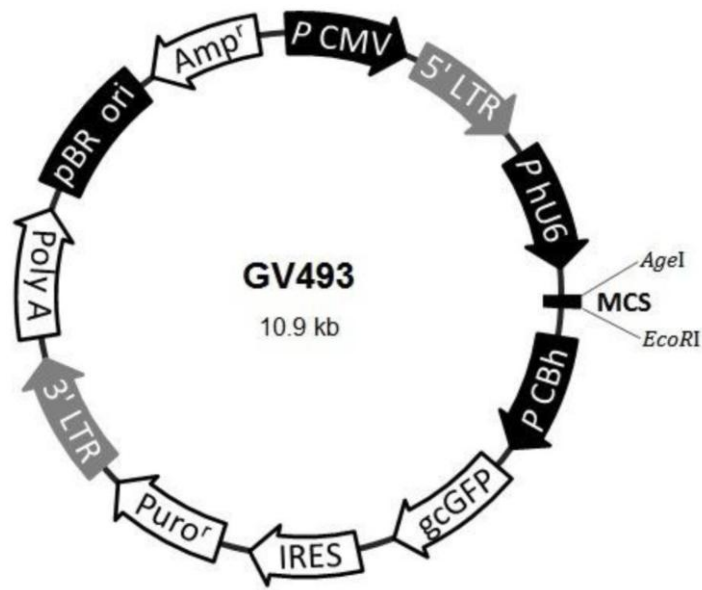

Supplementary Figure 1. The schematic diagram of lentiviral vector.

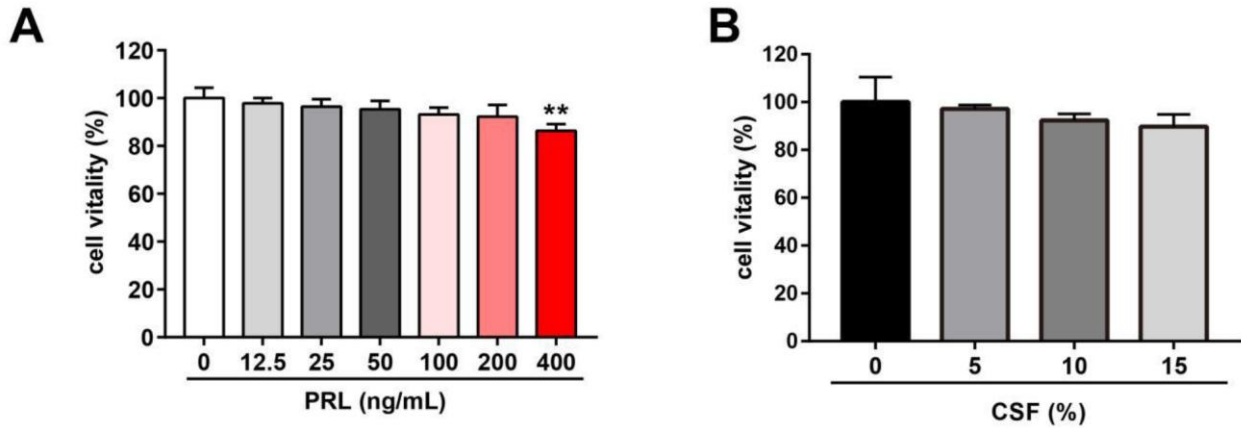

Supplementary Figure 2. Inhibitory effect of PRL or CSF in GT1-7 cells. (A) The change of cell vitality effected by different PRL concentration levels. (B) The change of cell vitality effected by different CSF concentration levels. Results were expressed as mean ± SD (n=3). \*\*p<0.01 vs Control group.

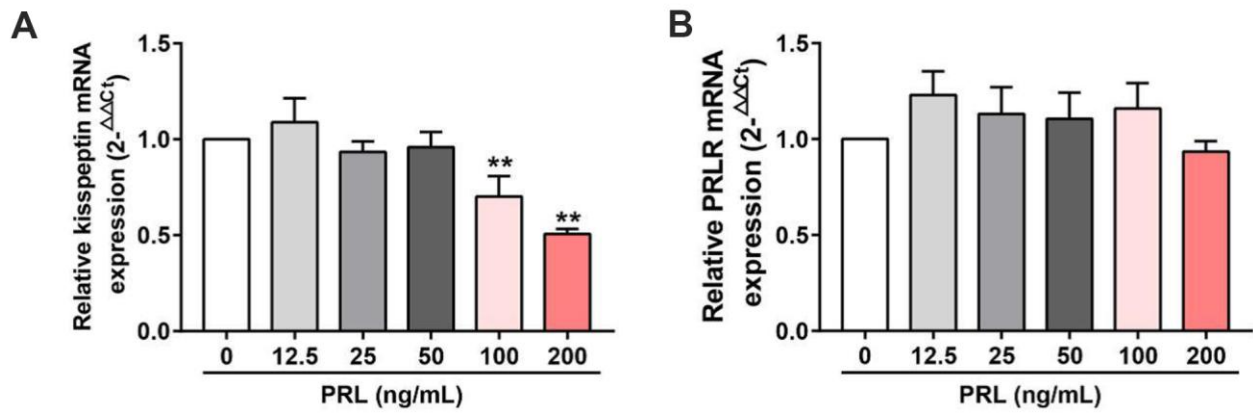

**Supplementary Figure 3. Effect of the mRNA expressions of PRLR and kisspeptin in GT1-7.** The mRNA expressions of PRLR and kisspeptin were detected by RT-PCR. The mRNA expressions of PRLR (A) and kisspeptin (B) were normalized to control. The results were presented as mean  $\pm$  SD (n = 3). \*\*p < 0.01, vs. Control group.

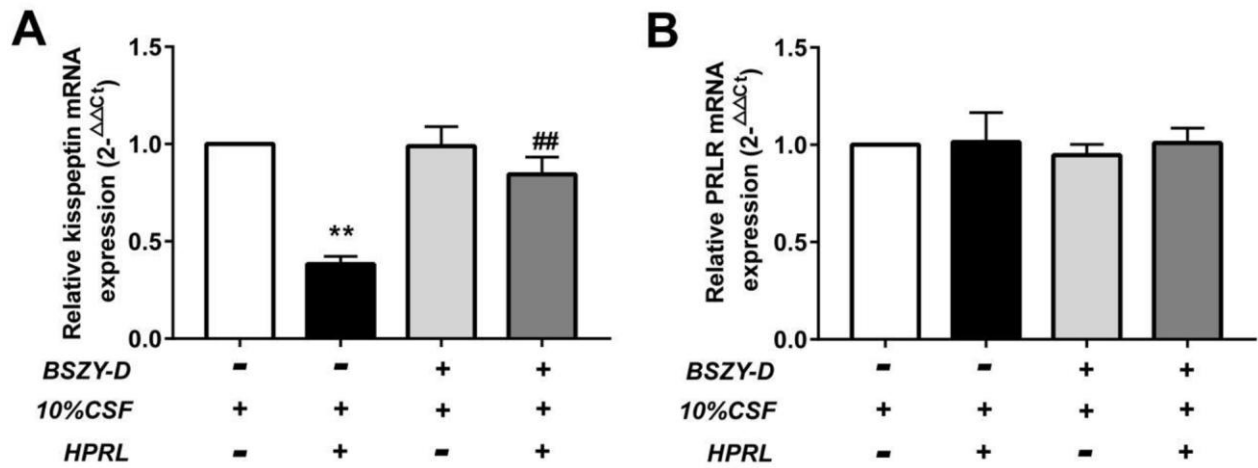

**Supplementary Figure 4. Effect of the mRNA expressions of PRLR and kisspeptin in GT1-7.** The mRNA expressions of PRLR and kisspeptin were detected by RT-PCR. The mRNA expressions of PRLR (A) and kisspeptin (B) were normalized to control. The results were presented as mean  $\pm$  SD (n = 3). \*\*p < 0.01 vs. Control group, ##p < 0.01 vs. HPRL group.

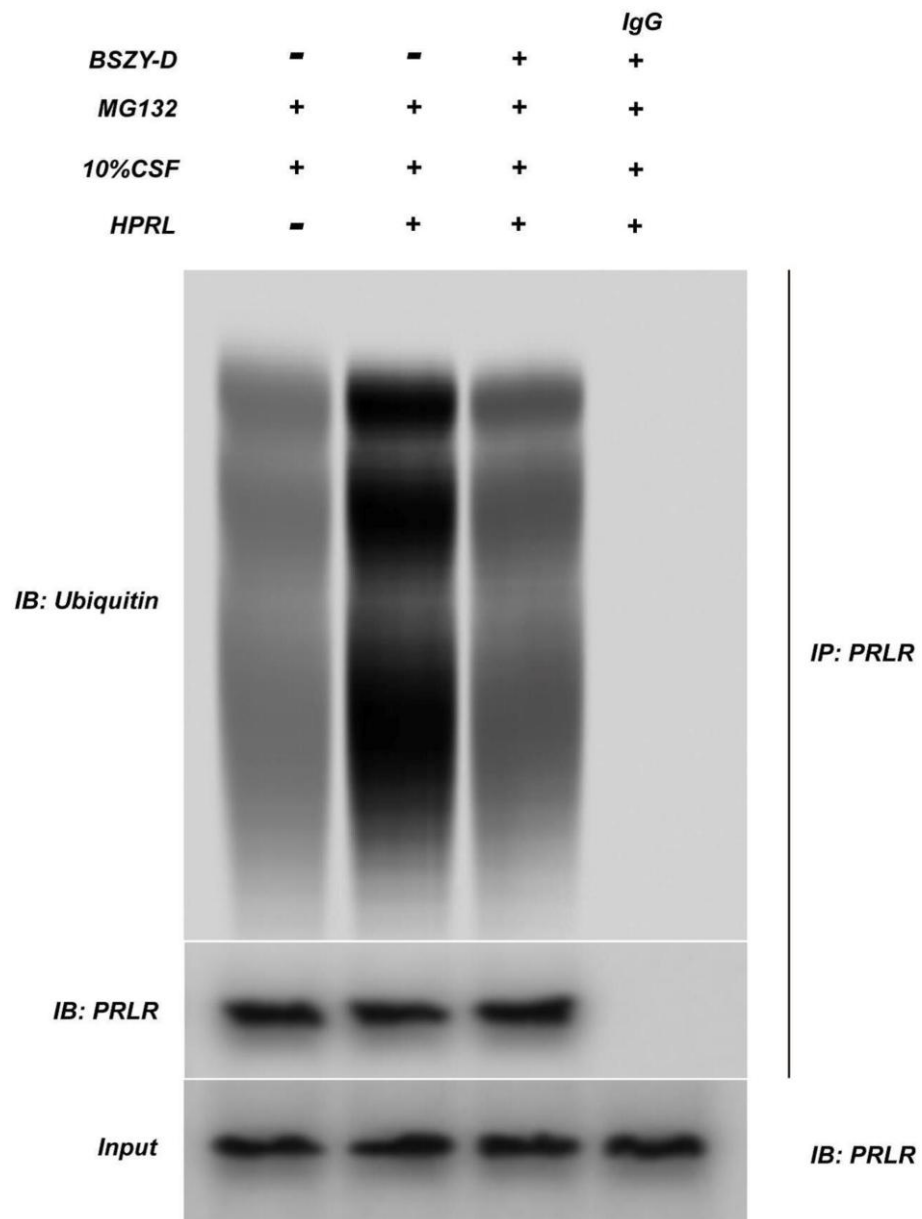

Supplementary Figure 5. The ubiquitin level of PRLR was measured with Co-IP. (n = 3).

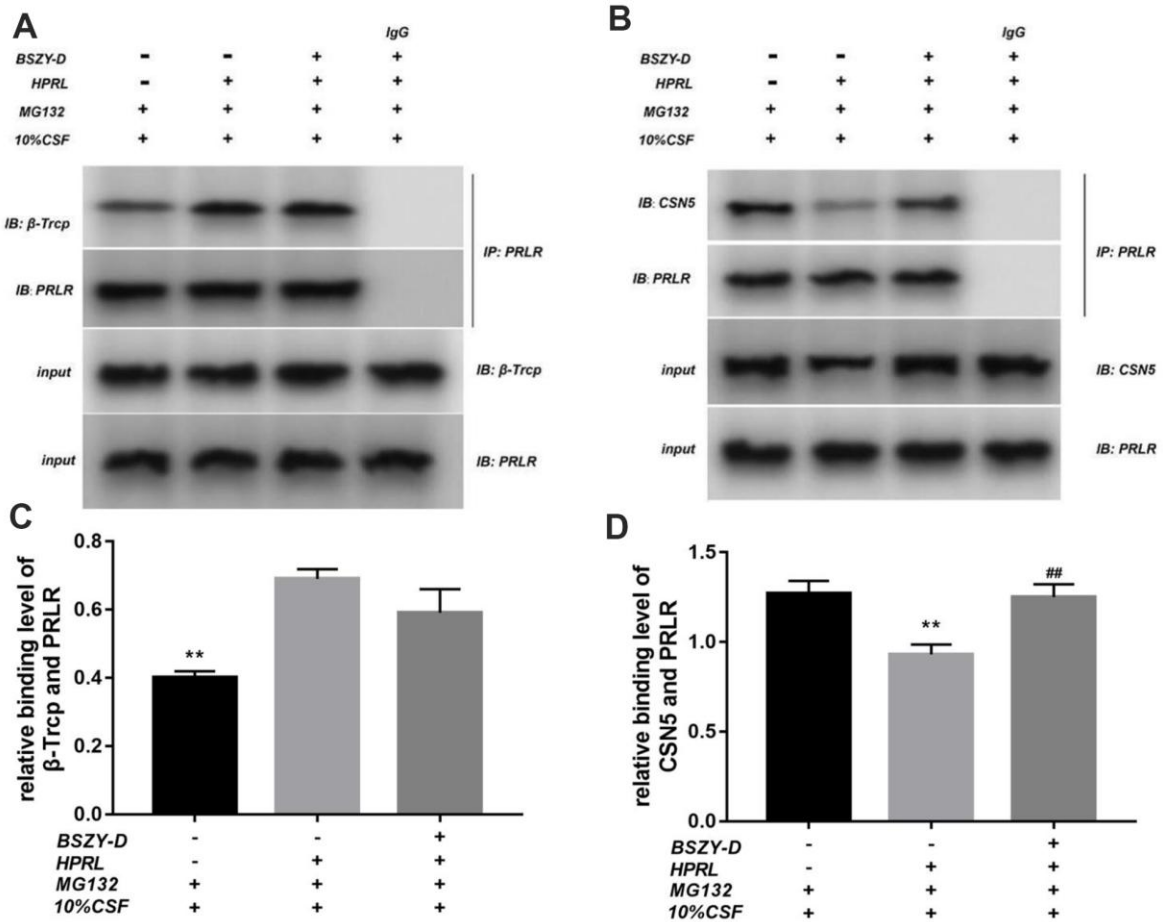

**Supplementary Figure 6. The level of  $\beta$ -Trcp, PRLR, and CSN5 were measured with Co-IP (n = 3).** (A) Representative blots of Co-IP between PRLR and  $\beta$ -Trcp. (B) Representative blots of Co-IP between PRLR and CSN5. (C) Quantitative relative binding level of RLR and  $\beta$ -Trcp. (D) Quantitative relative binding level of RLR and CSN5.

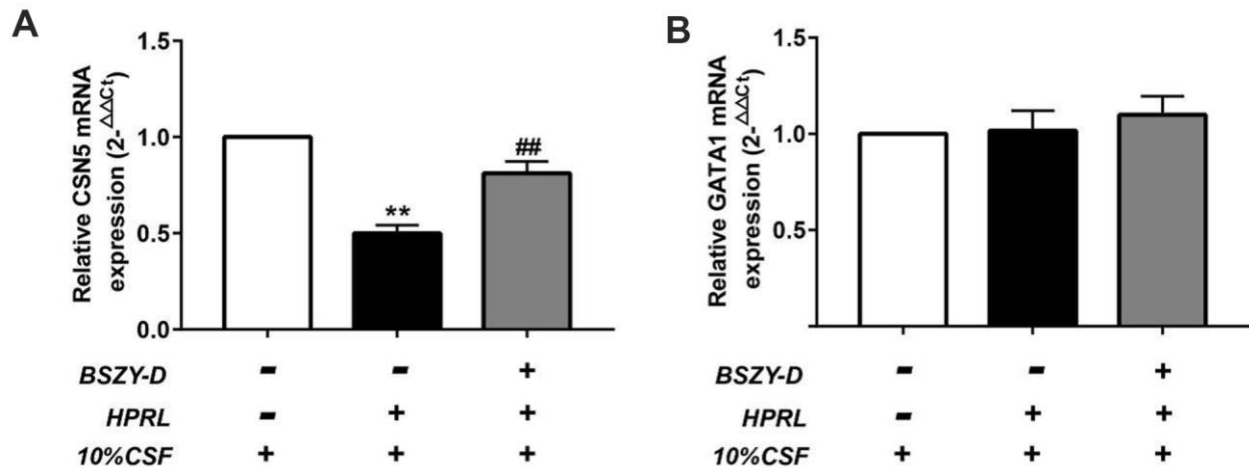

**Supplementary Figure 7. Effect of the mRNA expressions of CSN5 and GATA1 in GT1-7.** The mRNA expressions of CSN5 and GATA1 were detected by RT-PCR. The mRNA expressions of CSN5 (A) and GATA1 (B) were normalized to control. The results were presented as mean  $\pm$  SD (n = 3). \*\*p < 0.01 vs. Control group, ##p < 0.01 vs. HPRL group.

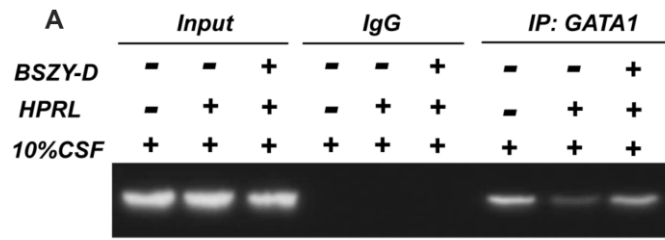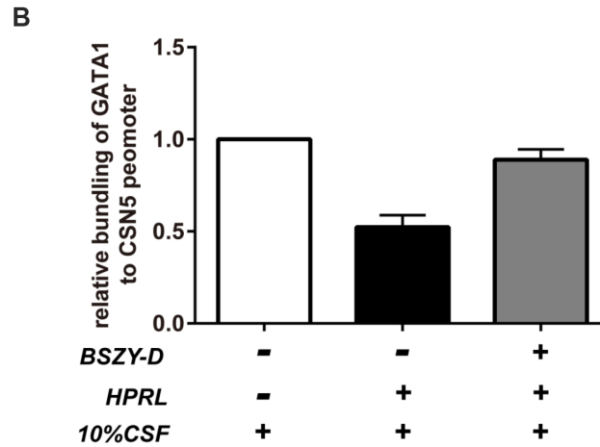

**Supplementary Figure 8. Chromatin immunoprecipitation (ChIP) assay on the promoter of GATA1.** (A) Representative blot of ChIP assay on GATA1. (B) Quantitative relative binding of GATA1 to CSN5 promoter. The results were presented as mean  $\pm$  SD (n = 3). \*\*p < 0.01 vs. Control group, ###p < 0.01 vs. HPRL group.

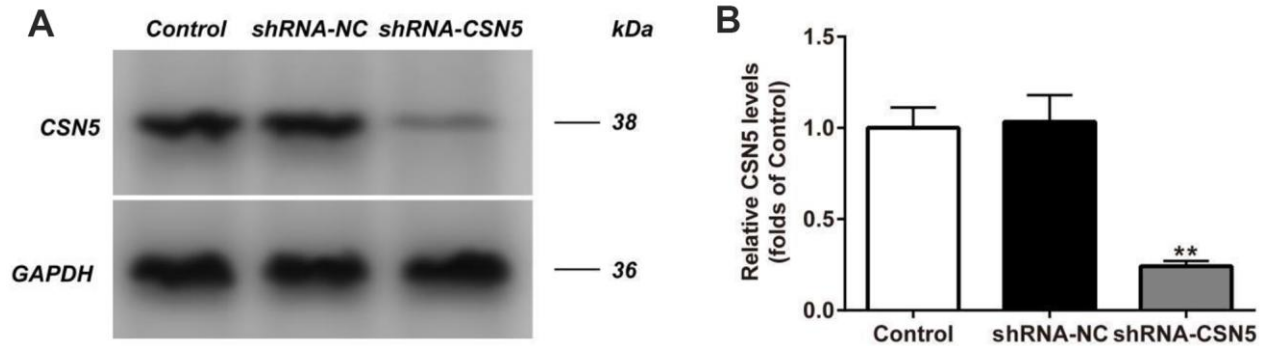

**Supplementary Figure 9.** The level of CSN5 in GT1-7 was detected by western blot assay and representative bands were shown in (A). The level of CSN5 (B) was normalized to control. The results were presented as mean  $\pm$  SD (n = 3). \*\*p < 0.01 vs. shRNA-NC group.

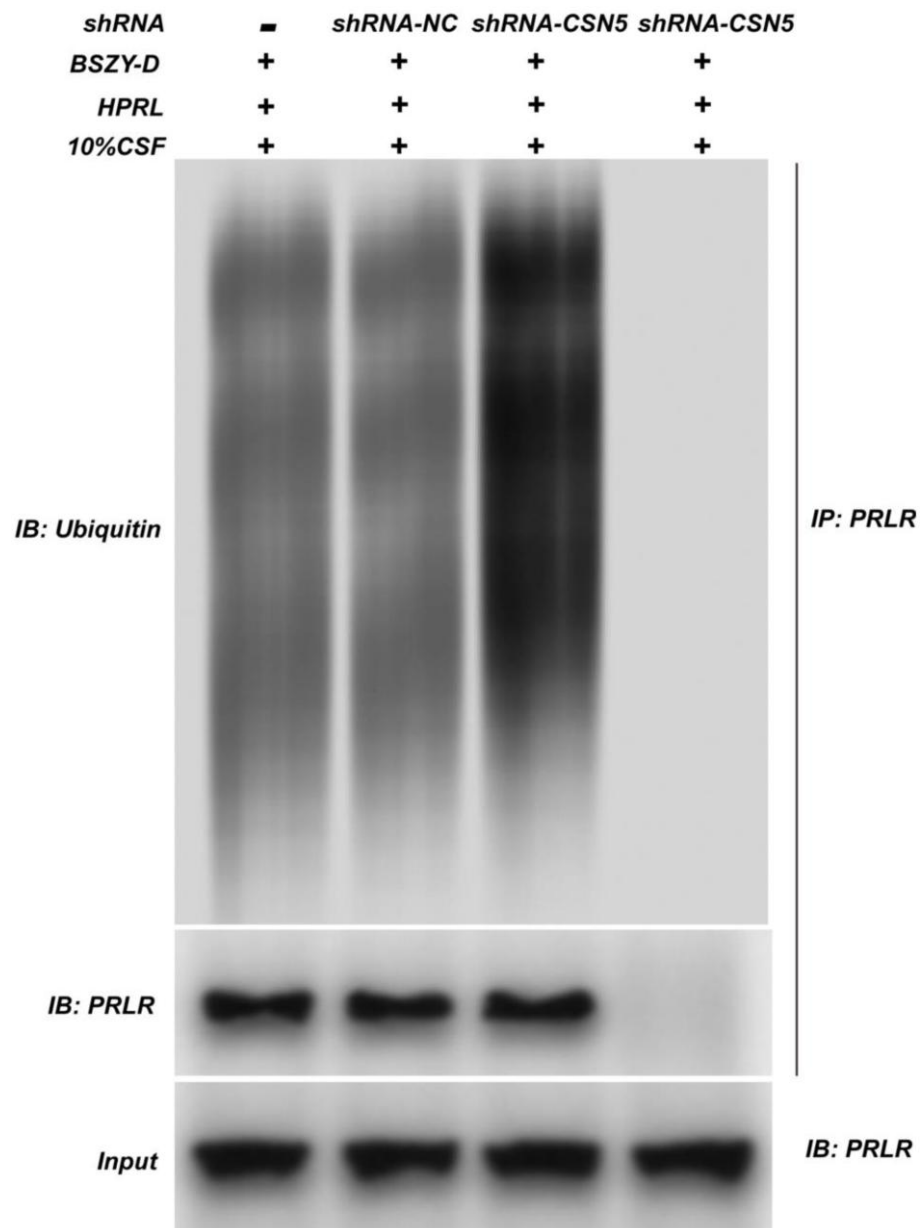

Supplementary Figure 10. The ubiquitin level of PRLR was measured with Co-IP (n = 3).
